# Supplementary material
Source: PubMed Central journal article supplement (PMC3375128)
Supplement: ned-0038-0186-s01.pdf [file ned-0038-0186-s01.pdf]

**Supplementary material**

**Title: ACCURACY AND SENSITIVITY OF PARKINSONIAN DISORDER DIAGNOSES IN TWO SWEDISH NATIONAL HEALTH REGISTERS**

By Feldman AL *et al.*

**Illustration of follow-up periods for the primary validity measures in the health registers.**

Abbreviations: CDR, Cause of Death Register; NPR, National Patient Register; PPV, Positive predictive value.

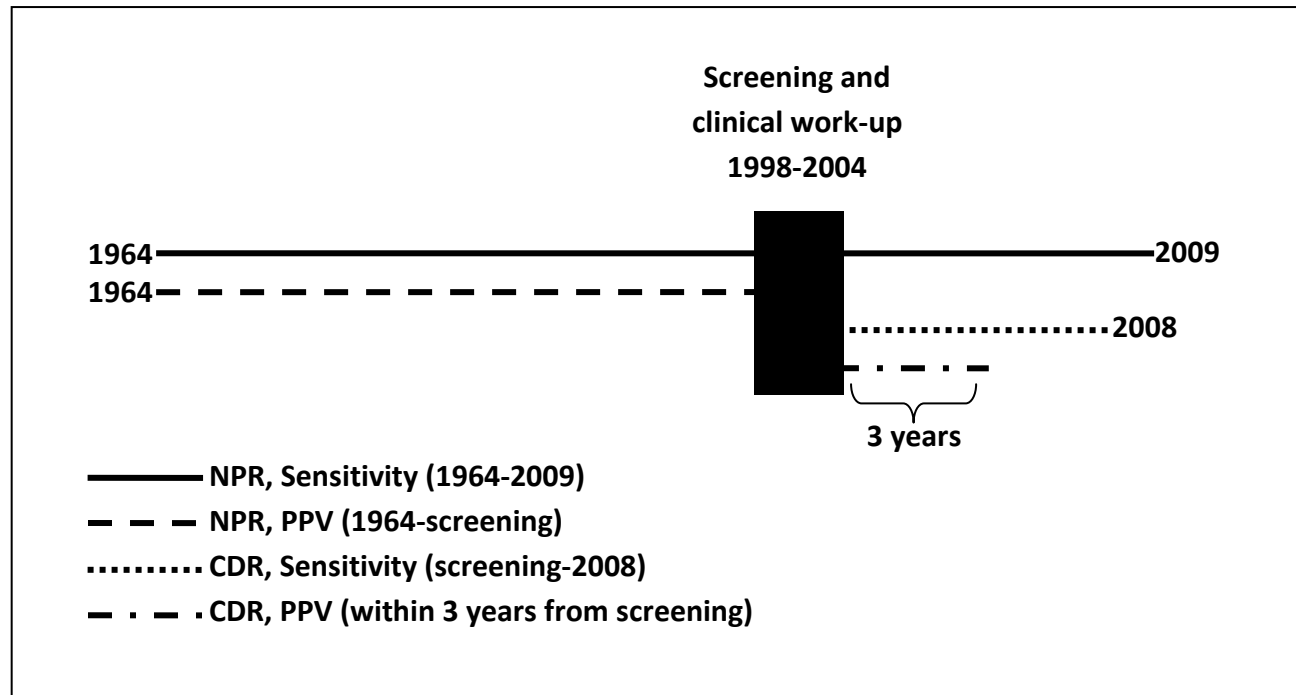

Corresponding author: Adina L. Feldman, Karolinska Institutet, Department of Medical Epidemiology and Biostatistics, PO-Box 281, 171 77 Stockholm, Sweden. E-mail: adina.feldman@ki.se.
